# Supplementary material for: Comparison of Photoelectrochemical Current in Amorphous and Crystalline Anodized TiO2 Nanotube Electrodes
Source: Hindawi journal article supplement (doi:10.1155/2019/9848740), 2019-05-16
Supplement: f1 [file 9848740.f1.docx]

SUPPORTING INFORMATION

**Comparison of Photoelectrochemical Current in Amorphous and Crystalline Anodized TiO2 Nanotube Electrodes**

Candy C. Mercado*, Michael Eric L. Lubrin, Hazel Anne J. Hernandez, Reynaldo A. Carubio, Jr.

Department of Mining, Metallurgical, and Materials Engineering, College of Engineering, University of the Philippines, Diliman, Quezon City 1101

Corresponding author:

Candy C. Mercado, ccmercado1@up.edu.ph

Present/Permanent address:

Department of Mining, Metallurgical, and Materials Engineering, College of Engineering, University of the Philippines, Diliman, Quezon City 1101


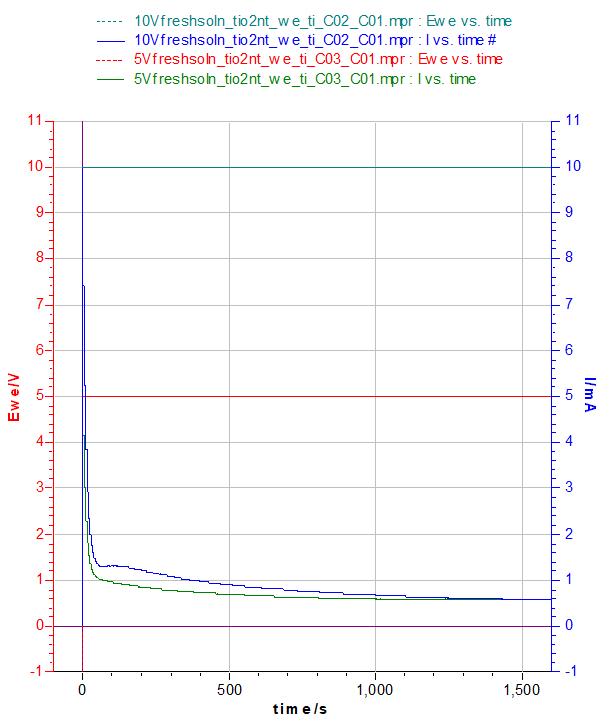


1

2

3


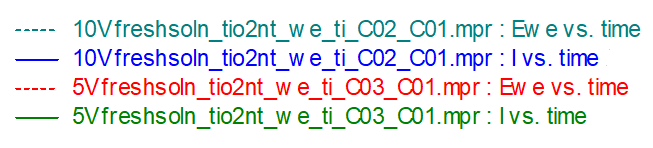


Figure S1. Current vs time as anodization progressed. 1 - shows the initial polarization of the solution, 2- shows the formation of nanotube structure, 3 – shows the slow and approaching constant growth of the oxide layer.


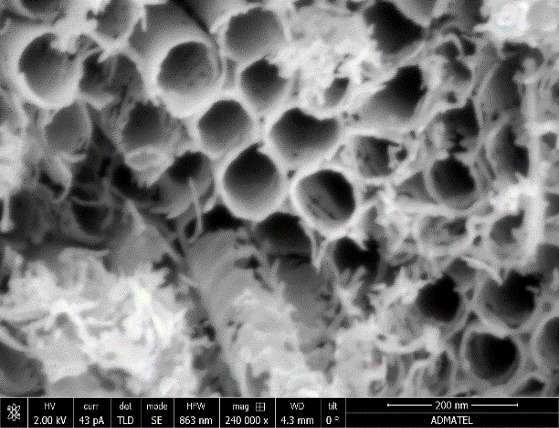


**30 RT**

**100 nm**


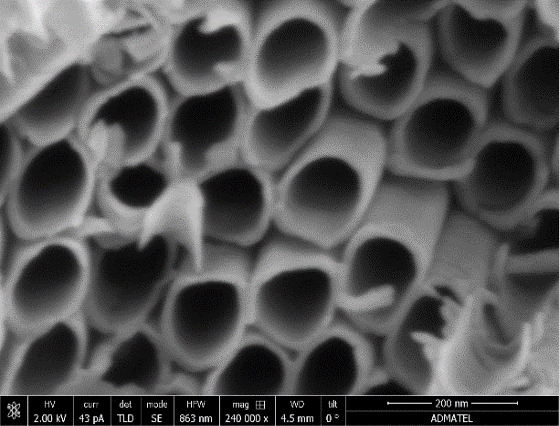


**40 RT**


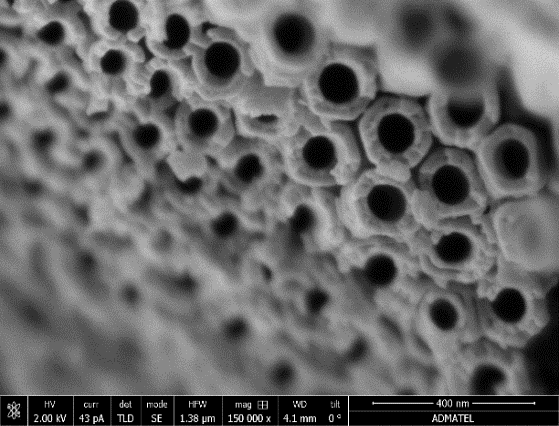


**50 RT**

**200 nm**


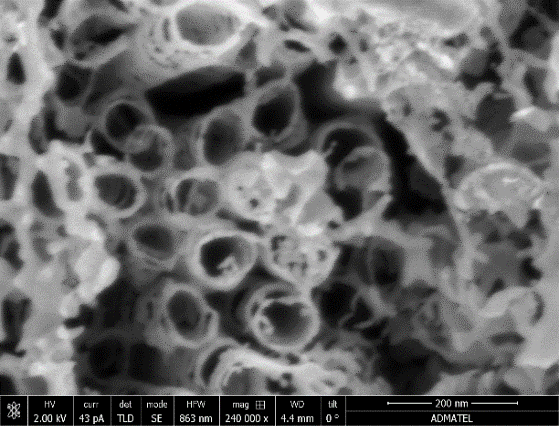


**30 LT**


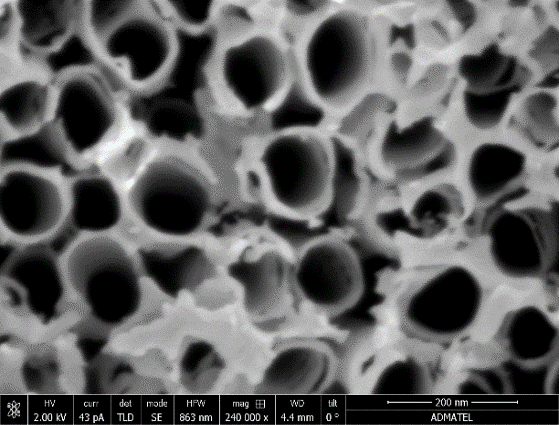


**40 LT**


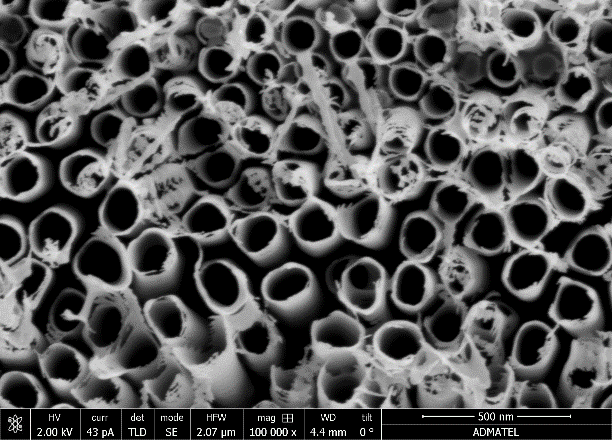


**50 LT**

**250 nm**

**100 nm**

**100 nm**

**100 nm**

Figure S2. Scanning electron microscope images of TiO2 nanotubes. 30 RT means processed at 30 V at room temperature, LT means low temperature 5 oC.

a. b.

c.
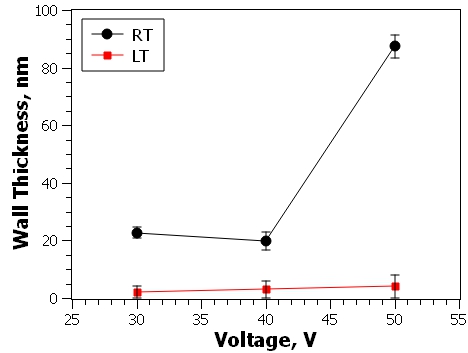
 d.
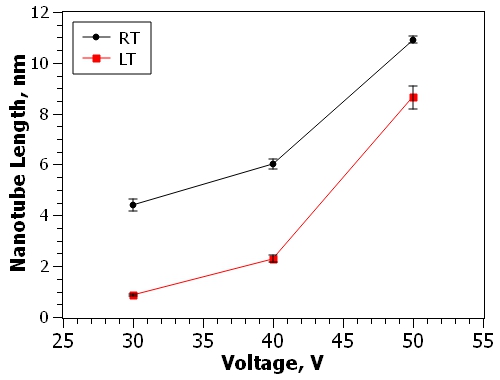


Figure S3. Nanotube dimensions for various anodization parameters. a) outer diameter of the tubes b) inner diameter c) wall thickness d) nanotube length; RT - room temperature, LT – low temperature 5 oC. In b.) and c.) the decrease in inner diameter and increase in wall thickness observed at the 50V sample anodized in room temperature are effects of the increased etching of the upper portions of the tubes leaving the lower portions exposed. The inner tube is cone-shaped with smaller pores near the bottom and larger pores at the upper portion.


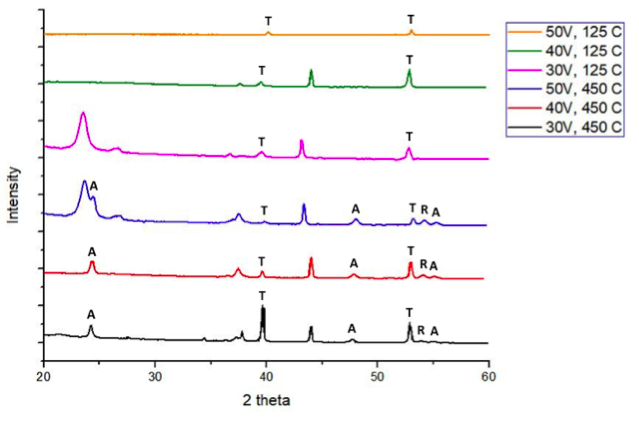


Figure S4. X-ray diffraction of samples anodized at 30, 40, and 50 V and heat-treated at 125 and 450 oC. Anatase (A) and Rutile (R) phases detected after 450 oC annealing, (T) is for the titanium substrate. The peak at 23 oC (present in the 30V and 125 oC, as well as the one beside the anatase peak in 50V, 450 oC) and the 43-44 oC (present in all samples except for the 50V, 125 oC) were artifacts of the XRD equipment.

Figure S5. Chopped light illumination current vs time for samples anodized at room temperature with a) 50 b) 40 c) 30 anodization voltages and heat treated at 125 oC. Shaded region shows illuminated response; unshaded shows photo-response in the dark. The lines show average values, inset shows actual potentiostat traces.

Figure S6. Chopped light illumination current vs time for samples anodized at 5 oC electrolyte temperature with a) 50 b) 40 c) 30 anodization voltages and heat treated at 450 oC. Shaded region shows illuminated response; unshaded shows photo-response in the dark. The lines show average values, inset shows actual potentiostat traces.

Figure S7. Chopped light illumination current vs time for samples anodized at room temperature with a) 50 b) 40 c) 30 anodization voltages and heat treated at 450 oC. Shaded region shows illuminated response; unshaded shows photo-response in the dark. The lines show average values, inset shows actual potentiostat traces. In c) -0.5V measurement showed unstable results and no data was collected.
